# Supplementary material for: Gene Structure Analysis of Chemokines and Their Receptors in Allotetraploid Frog, Xenopus laevis
Source: Front Genet. 2022 Jan 20;12:787979. doi: 10.3389/fgene.2021.787979 (PMC8811506; doi:10.3389/fgene.2021.787979)
Supplement: Supplementary file 1 [file DataSheet4.FASTA]

# Predicted peptide sequences of Xenopus chemokine receptors with Accession numbers.

>Cxcr1_XP_031749641.1
MGCSLVLGTEPGASQQEQEQQRQVANQEMNMSYKVDGSIFDDFEFNYSDTTEFPTVLSSPCKSTWVINKYFVVVVYALVFFLNVVGNSLVVLVIYYNKLKRSSTDVYLLHLAIADLLFATTLPFWAAYKASQWVFGVFMCKAVSVLQEVNFYSGILLLACISIDRYLAIVHATEAVTQKRHWVKFICLGIWIFSLAISLPTLLFRTVFKSPRGVDVCHDSIGNENTEDWMIILRIGRHLVGFFIPLLIMLFCYGFTIKTLYQTKSSQKHRAMKVILAVVLAFLICWLPYNLTVIVDSLMRTRFINETCKMREHLDAAISVTEIFGYVHSCINPILYAFIGQKFRNSFLRILASKGIISKSFLARYASGSSYGSTSGNTSTTL
>Cxcr1.L_XP_018091152.1
MSFVFDGSLFNDFDFNYTDISTEFPTIISAPCKSTWVINKYFVVVVYTLVFFLNVVGNSLVVLVIYYNKLKRTSTDVYLLHLAIADLLFATTLPFWAAYKASQWVFGIFMCKTVSVLQEVNFYSGILLLACISVDRYLAIVHATEAVTQKRHWVKFICLGIWIFSLAVSLPTLLFRTVFKSPKDAYVCHDSIGNENTEDWMIILRIGRHLVGFFIPLMIMLFCYGFTIKTLYQTKSSQKHRAMKVIFAVVLAFLICWLPYNLTVIVDSLMRTKFINETCEMREHLDAALSATEIFGYMHSCINPILYAFIGQKFRNSFLRILASKGIVSKSFLARYARGSSFSIGSTSGNTSTTL
>Cxcr1.S_NP_001082234.1
MSFNFDGSFFNDIDFSDIPTGFPTVISAPCKSTWVINKYFVVVVYALVFFLNVVGNSLVVLVIYNNKLKRSSTDVYLLHLAIADLLFATTLPFWAAYKASQWVFGIFMCKAVSVLQEVNFYSGILLLACISVDRYLAIVHATEAVTQKRHWVKFICLGIWIFSLVVSLPTLLFRTVFKSPRDAYVCHDSIGNENTEDWMIILRIGRHLVGFFIPLLIMLFCYGFTIKTLYQTKSSQKHRAMKVIFAVVLAFLICWLPYNLTVIVDSLMRTRFINETCEKREHLDAALSTTEIFGYTHSCINPILYAFIGQKFWNSFLRILASKGIVNKSFLARYARGSTFSFGSTSGNTSNTL
>Cxcr3_XP_031762580.1
MANSGHGLQIYDDLDVETSSIFNYDYSTSSESNDVAPCDLQTTIIFDRSFLPAFYSILFLLGILGNVLVMVVLLQNRKRLQSTDIFLLHLALADILLVVTLPFWATQAVSGWLFGNVLCKTVASIFKINFYACTFLLVCISCDRYLAIVYAVQVYKKHRTNLVHWSCLFVWCLCVGLSVPDMVHFQVAYEPRTNVTECQPVFGSSNFKTWRVSMAFLYHIVGFLLPLCFMLYCYTHIIHTLFQTHGFKKQRALRVIITVVVAFFLCWTPYNIVALLDTLNLLHVLADNCTIDSNIDIALSVTSGLCYFHSCLNPLLYAFVGAKFKKKLVELLSKLSCICPQIVKNYIKHSPSAKSSTWSESGETSISRM
>Cxcr3.L_XP_041425526.1
MQSETQDLPANMDFDGHRIYNADDFESSSPFYDYKSSTETTDEAPCNLQTTVMFDRSFLPAFYSIVFLLGMLGNVLVLVVLLQNRWRLQSTDIFLLHLALADILLVVTLPFWATQAVSGWIFGNVLCKMVASIFKINFYACTFLLVCISCDRYLSIVYAVQLYKKHRTHLVHWSCLLVWCLCIGLSIPDMVYYRVTYEPRANVTDCQPDFGHLDSKTWKISLTFLYHIVGFLIPLCFMVYCYTHIIHSLCQTHGFKKQKALRVVIAVVVIFFLCWTPYNIVALLDTMNILNVLPDNCTTDSNIDIALSVTSGLCYFHSCLNPLLYAFVGAKFKMKLVELLNKLSCICPQIVKKYIKYNPPAKPSTWSESGDTTVSAM
>Cxcr3.S_XP_018083931.1
MVYNNVMAFYDSDIESNTFYDYVSISESIHAVAPCNLQTTVTFDRSFLPAFYSIVFLLGILGNVLVMVVLLQNQWRLQSTNIILLHLALADILLVVTLPFWATQAVSGWIFGTVMCKMVASIFKINLYACTFLLVCISCDRYLSIVYAVQLYKKQRTHLVHWSCLLVWCLCIGLSIPDMVHFQVIHEPRTNMTQCQPNFDSSTFKIWRVSMTFLYHIVGFLLPLCFMVYCYTHIIYTLCQTRGFKKQKALQVIIAVVVTFFLCWTPYNIVALLDTMNMLNFLADNCTTDSNIDIALSVTSGLCYFHSCLNPLLYAFIGAKFKRKLIELLSKLGCICPQFVKNYIKYNPPAKSSTWSESGDTLASRM
>Cxcr3l_NP_001011067.1
MAENQDDYYSSDDIFTGLPIIPPGASPCNYEVTSRFNKWFIPATFLLVFLLGLVGNGLVLYVLKSRRCSWHLSDHYLFHLTLSDLFLGLTLPFWATQYAYGWVFGSVPCKLVGALFSINMYSSIFFLACIGLNRYFAIVHAVELHRKQRPIHTFLICAVVWATSCLLSLQEFYFRDVDFIKQLKSHSCHYKFDPETADTWRTTIRLINLSLGFLLPLFLMFFFYCRIFCTLRKSRHGHSYRSQVVIVVLLFVFVLCWGPYNTLLLIDSLQRLDVIAPSCPLFQKLDIGLTVTETLGLSHVCLNPFIYAFVGVKFKSELSRLSKRVSGKVISSGVTGSKEETIVIETNNSYTKVF
>Cxcr3l.L_XP_018082201.1
MAESHEEDYSSYYVDTALPEIPEEAAPCSYHVTSRFNQWFIPVTFLLVFVLGLIGNGLVLYVLKSRRCSWHLSDHYLFHLTLSDLLLGLTLPFWATQYAYGWVFSSIPCKLVGALFSINMYSSIFFLACIGLNRYFAIVHAVELHRKQRPIHTFLICAVVWATSCLLSLQEFYFRDVDFVEQSKAHSCHYKFNPETADTWRTTLRFINLSLGFLLPLFLMFFFYSRIFCTLRRSRHGHSYRSQVVIVVLLFVFVLCWGPYNTFLLIDSLQRLGVIGPNCSLFKKLDIGLTVTETLGLSHVCLNPFVYAFVGVKFKSELSRLSKRVSGKVVSSGFTGSKEESGVIQTNNSYTRVF
>Cxcr3l.S_NP_001267519.1
MAEGQEQDHTDDYGTYTGLPDIPAGAAPCDYHETSRFNQWFIPATFLLVFLLGLIGNGLVLYVLKSRRCSWHLSDHYLFHLTLSDLLLGLTLPFWATQYAYGWIFGSIPCKLVGALFSINMYSSIFFLACIGLNRYFAIVHAVELHRKQRPIHTFLICALVWGTSCLLSLQEFYFRDVDFVKQSKAHSCHYNFNPETADTWRTTIRFINLGLGFLLPLALMFFFYCRIFCTLRKSRHGHSYRSQVVIVVLLFVFVLCWGPYNIFLLIDSLQRLGVIGPSCSLFKQLDIGLTITETLGLSHVCLNPFVYAFVGVKFKGELSRLSKRVSGKLTSSGVTGSKDESGVIETNNSYTRVF
>Cxcr4_NP_001090831.1
MDGFSGGIDINIFDSNSTENGSGDFEDFSEPCFMHDNSDFNRIFLPTIYSFIFLLGIIGNGLVVVVMGYQKKSRTMTDKYRLHLSVADLLFVFTLPFWSVDAAIGWYFKEFLCKAVHVIYTVNLYSSVLILAFISLDRYLAIVHATNSQGSRKMLADKVVYAGVWLPALLLTVPDLVFARVSDENGQFVCDRIYPIDNRETWTVGFRFLHITVGLILPGLIILICYCVIISKLSHSKGHQKRKALKTTVILILAFFACWLPYYVCLTTDTFMLLGLLKADCIWENTLHKAISITEALAFFHCCLNPILYAFLGAKFKTSAQNAFTSVSRGSSLKILSKKRAGLSSVSTESESSSFHSS
>Cxcr4.L_OCT63437.1
MDGFSGGIDINIFDGNSTENGSGDFEDFIEPCFMHENSDFNRIFLPTIYSFIFLLGIIGNGLVVVVMGYQKKSRTMTDKYRLHLSVADLLFVFTLPFWSVDAAIGWYFKEFLCKAVHVIYTVNLYSSVLILAFISLDRYLAIVHATNSQGSRKMLADKVVYAGVWLPALLLTVPDLVFARVSDENGQFVCDRIYPIENRETWTVGFRFLHITVGLILPGLIILICYCVIISKLSHSKGHQKRKALKTTVILILAFFACWLPYYVCLTTDTFMLLGLVKGDCIWENTLHMAISITEALAFFHCCLNPILYAFLGAKFKTSAQNAFTSVSRGSSLKILSKKRAGLSSVSTESESSSFHSS
>Cxcr4.S_NP_001080681.1
MDGFSGGIDINIFDGNSTENGSGDFEDFIEPCFMQENSDFNRIFLPTIYSFIFLLGIIGNGLVVVVMGYQKKSRTMTDKYRLHLSVADLLFVFTLPFWSVDAAIGWYFKEFLCKAVHVIYTVNLYSSVLILAFISLDRYLAIVHATNSQGSRKMLADKVVYAGVWLPALLLTVPDLVFASVSNENGQFVCDRIYPIDNRETWTVGFRFLHITVGLILPGLIILVCYCVIISKLSHSKGHQKRKALKTTVILILAFFACWLPYYVCLTTDTFMMLGLVKADCIWENTLHKAISITEALAFFHCCLNPILYAFLGAKFKKSAQNAFTSVSRGSSLKILSKKRAGLSSVSTESESSSFHSS
>Cxcr5_XP_031762581.1
MLGMESAVVFFSDINESDLSVYDSNWNESDSDEESLNDTRGYVCLQSFQDDSMGTLVHFQKFFIPLVYTLVFILGCLGNSLVLLILIKFRRSRSTTENFLLHLALADLLMLVTFPFAITESVAGWVFGSFLCKFVGVINRINFFCSSLLLGCISVDRYIAIIHAIHTFRSRRLVAVHLPCFGVWALCFLLSMPNLFVLGIQENGNVTTCTYHQSHFPSNGWWQTGRFLNHIVGFLLPLSIMGFCYAHIVAALCRSPRLEKKKAVRLAIVVTGVFLLCWTPYNVTVFIDTLDQLGLVHNCQVREELPIAITVTEFLGYVHCCLNPILYAFVGVKFRNDALRILRRAGCLSSLMPEVSLNFDRKSSATDSENGTVMYSF
>Cxcr5.L_NP_001267516.1
MESTGFVLNNIEESDFLDFLIPDLNESNYEESLNDTSDFVCPETFQDEPLGTLVHFQRVFIPLVYTLVFILGFLGNSLVLLILIKFRRSRSTTENFLLHLALADLLLLVTFPFAITESVAGWVFGRFLCKLVGVISRVNFFCSNLLLGCISVDRYIAIIHAIHTFRSRRLVAVHLPCFGVWALCFLLSMPNLFVLEIQENGNVTTCTYHQSHFPSSRWWQTGRFLNHIVGFLVPLMIMGFCYAHIVTALCRSPRLEKKKAVRLAILITVVFLLCWTPYNVTVFIDTLEQLGLVQSCKVRKELPFAITVTEFLGSVHCCLNPILYAFVGVKFRNDALRILRKAGCFRSLISAVPLHFDRKSSATDSENGTVMYSF
>Cxcr5.S_OCT56785.1
MAWSSLLSPPSSALSLAGLRREDRATKGEITKQVWAARRFDCSLFGSVSKRRVCTLLCWESTRRSMCSPDDVLKCVPYKSRGELDWNESNYGESLNDASDYVPCFKPLKNESLVTLVHFQRYFIPLVYTLVFILGSMGNSLVLLILIKFRRNRSTTENFLLHLALADLLMLLTFPFAITESVAGWVFGSFLCKLVGVISRVNYMCSSLLLGCISVDRYISIIHAIHTFRSRRLVAVHLPCFGVWALCFLLSMPNLFVLGIQENGNVVTCTYHQNHFPSNRWWQTGRFLNHIVGFLLPLMIMGFCYAHIVAALCRSSRLEKKKAVRLAIVVTGVFFLCWTPYNVTVFIDTMDQLGLVQNCKIQKELPIAIIVTEFLGYIHCCLNPILYAFVGVKFRNEALRILRKAGCLRSLMSEVTFNFDRKSSATDSENGTVMSSF
>Cxcr6_XP_017950420.2
MNNTMTTGIDYDDVPDNTHVDMLRHYFLPILYSVTCITGLVGNLLIIIIYAFYEKMKTLTDTFMVNLAMADILFLCTLPFLAYQAAEGWIFGKLMCKIIRGGYRINLYSSMLILTCITFDRFISITQAKKLKISHSKKHRWGKLVCVIAWAVSLILAVPQFMFSGREEPKCFEIYPEGHKYLNLIVNSFQITVGFFVPLAAMIFCYTFIIKTLIFSSNFQKHKSLKIIFLVVIAFIVTQLPYNIAILCHVLYKTINAKVLVITEAIAYLHACINPILYFFVGIKFRKNFCKILVDLHLAKPNLELSDNLKTTDRDSRSISAFNNTETITMHQL
>Cxcr6.L_AAI57472.1
MTNNTEESEIIYYDEETSDSDHHMLHDYILPVLYSVTCVTGLVGNLLIIIIYAFYEKMRTLTDTFMVNLAMADIFFLCTLPFLAYQVAQGWIFGEVMCKITRVVYRINLYCSMLLLTCITFDRFISITQAKKFNMYHSKKHSLGKLVCMIVWLVSLLLAVPQFKYSVTSNENCFEVYDPPHLEVMVNSFQITVGVFLPLAAMIFCYTFIIKKLIFASNYQKHKSIKIIFMVVMAFIATQLPYNIGILCHVVYKTFDKTFMLITEAIAYMHACLNPILYFFVGVKFRKNFWKILEDLRLAKPNMELSDNLKTTDRESKSISVYNNTEAISMNQL
>Ackr3_NP_001025605.1
MSAADFAAAMDYMESMNSTEFNLSCSNGDCIILESLSCPNTLNKSALLYTLAIVYIFIFVMGLLANSMVIWLNLQAKTTGYETHLYIFNLAIADLCVLLTLPVWVVSLVQHNQWPMGEMTCKITHLVFSINLYSSIFFLTCMSVDRYLCVSLNGTAGQRRRKIIRRLVCVLVWLVAFVVSLPDTYYLKTVSSPVTNETYCRSMYPEETFKEWLLGMEIVSIMLGFVIPFPIIAIFYCLLAWTLSSSSSSSGDQERRISGRLIVSYVVVFMVCWLPYHAMVILDVMSFLQLLPFSCFLDNFLYAALHITQCYSLLHCCINPILYSFIHRNYRYEIMKAFIFRYSSKTGLTKLIESSKVSEAEYSAVDQIPK
>Ackr3.L_NP_001082236.1
MSAADFAAAMDYMESMNSSDFNLSCSNGDCIILESLSCPNTLNKSALLYTLAIVYIFIFVMGLLANSMVIWLNLQSKTTGYETHLYIFNLAIADLCVLLTLPVWVVSLVQHNQWPMGEMTCKITHLVFSINLYSSIFFLTCMSVDRYLCVSLNGTAGQRRRKIVRRLVCVLVWLVAFVFSLPDTYYLKTVSSPVTNETYCRSMYPEETFKEWLLGMEIVSIMLGFVIPFPIIAIFYCLLACTLSSSSSSSGDQERRISGRLIVSYVVVFMVCWLPYHAMVILDVMSFLQLIPFSCFLDNFFYAALHITQCYSLLHCCINPILYSFIHRNYRYEIMKAFIFRYSSKTGLTKLIESSKVSEAEYSAVDQIPK
>Ackr3.S_XP_018094428.1
MSAADFAAAMDYMESVNSSDFNLSCSNGDCIILESLSCPNTLNKSALLYTLAIVYIFIFVMGLLANSMVIWLNLQAKTTGYETHLYIFNLAVADLCVLLTLPVWVVSLVQHNQWPMGEMTCKITHLVFSINLYSSIFFLTCMSVDRYLCVSLNGTAGQRRRKIIRRLVCVLVWLVAFVVSLPDTYYLKTVSSPVTNETYCRSMYPEETFKEWLLGMEIVSIMLGFVIPFPIIAIFYCLLAWTISSSSSSADQERRISGRLIVSYVVVFMVCWLPYHAMVILDVMSFLQLLPFSCFLDNFLYAALHITQCYSLLHCCINPILYSFIHRNNRYEIMKAFIFRYSSKTGLSKLIESSKVSEAEYSAVDQIPK
>Ackr4_XP_002937785.1
MEEKINTTQRPTTENYDEYGDTTFDYSNYEELCEKKGVRQFAQIFLPAFYAVAFVIGVAGNSLVVAIYAYYKKMKSKTDVYLLNLAVADLLLLFTLPFWATDAAVGWQFGIFMCKITSAMYTINFSSGMQFLACISLDRYFAVTKAPNPQPIRKICWVTCLFVWSTSMLLSIPDLYFSTVKEHNNKHACLPVYPKDTIKQTTVLIQILEIVFCFLLPFLVMLFCYASMAKIVLQTPNIKRSRSLKVLLAVVGVFLITQLPYNVIKFWRAIDIIYALITSCSMSRTIDIMIQVTESLALFHSCLNPILYAFMGTTFKSYISKIAKRYGALRRQRIQSTEEYAMHSENHVEETSSFSI
>Ackr4.L_XP_018122113.1
MEEKINTTIRATTENYDEYGDTTFDYGNYEELCEKKEVRQFAQIFLPAFYAVAFVIGVAGNSLVVAIYSYYKKMKSKTDVYLLNLAVADLLLLFTLPFWATNAAVGWQFGIFMCKITSALYTINFSSGMQFLACISLDRYFAVTKAPSAQPVGKMGRVICLFVWSTSMLLSIPDLYFSTVKEHNNKHACLPVYPKDKVKQTTVLIQILEIVFCFLLPFLVMVFCYASMAKIVLKTPNIKRSRSLKVLLAVVGVFLVTQLPYNVIKFWRAIDIIYALITSCSMSRTIDIMIQVTESLALFHCCLNPVLYAFMGTTFKCYISKIAKRCGSLRRQRIHSTEEFSMHSENHVEETSSFSI
>Ccr2_XP_004915406.1
MNHTPAVIEDLSTLFTNYDDYTPCDKDEIKQKAAKFLVPVYIFVFLLGIIGNALVIIILIKYKKLRNMTDIYLLNLAISDLLFVISLPFWAYYVTNDWAFGDALCKLFSGLYLTGFYGASFFIILLTLDRYLAIVHAIFAMKVRTVKFSISTSVFLWGIAIFFSLPGFIFYKAEKQAGNWTCSPYYTTSWKLIFTFMMTILGLFIPLVVMLFCYSRIIYTLLRCRSEKKKHKAVKLIFIIMVVFFIFWMPYNIVYLMHTFQDPESPNACETSNKLDEAVQWTEAISYFHCCLNPIIYAFVGEKFRKYLFIFLQKVFPNWCLCSSLFSTHMSLHERHSSLYTPSTGEHDISAVL
>Ccr2.L_NP_001088014.1
MNHTQAYDGGVTTDYYDSDYSPCEKDDIKQKAAKFLVPVYIFVFLLGIIGNALVIIILIQYKKLRNMTDIYLLNLAISDLLFVISLPFWAYYITKDWVFGDALCKILSGLYLTGFYGASFFIILLTLDRYLAIVHVIFAMKVRTVKFSIFTSIVLWGIAVLFSLPGFIFYKAEKQIDVWTCSPYYTGAWKTIFTLVMSILGLFIPLVVMIFCYSRIIYTLLRCKSERKKHKAVKLIFIIMVVFFIFWMPYNIVYIMHSFQDSDSINACKMNKKLDEAVQWAEAISYFHCCLNPVIYAFVGEKFRKYLFIFLKKVLPGWSFCSSHFSTHMSLHERHSSLYTPSTGEHDISAVL
>Ccr2.S_XP_018079075.1
MNHTLADALELTTADYYNSDYGLCDKTDLKQKATKFLVPLYIFVFLLGIIGNALVIIILIQYKKLRNMTDIYLLNLAISDVLFVFTLPFWAYYIAKDWPFGDALCKIYSGLYQTGFYGASFCIILLTLDRYLAIVHAIFSLKVRTVKFSICTCFILWGIVTLFSLPAFIFHEAKKQDDVWTCSPYYPEGPWKLILTLMMSILGLFIPLVVMIFCYLRIIYTLLQCKSEKKKHKAVKLIFIIMAVFCIFWMPYNIIYIMHSFQDPDRKDACNTNKRLDEAVQWTEAISHIHCCLNPIIYAFVGEKFRKYLFIFRKKIFPGWSFCTGPLSTNMSMHERHSSLYTPSTREQDISAIL
>Ccr6_XP_002935872.2
MCKFIRSIYAINFTCSMLLLACVGIDRYVAIVQVTKSFRFRTTTMAYKRVICFSVWIMSACLSGLTYYFSKCYKYNERFVCEASYPEDATALKWKLAVIIVQISLGFCIPFFVMFFCYLCIIKTLLQAHNSQRHKAIRVIVAVVAVFLVCQVPYNVVLVIKATQLGRTDGICSKNINYAYAFFITETVAFFHCCLNPVIYAFVGVKFRNYFMKIMQDLWCISKQYMVGSRISRVPSETSRRTSEVYVTEGGSSFTM
>Ccr6.L_OCT80269.1
MEVSSTTVFNFTDISEDDGKVCNLDDVRQFKKKFAPVVLALIFAVGLVGNLLVIITFRYYKRTKSMTDVYLLNMAVADILFVFTLPFCMLLLACVGFDRYVAIVQVTKSFRFITATMAYKRVICLFVWIMSACLSSLTYSFSKCYKHNERFVCEASYPEDKTAIKAHNSQRHKAIRVIVAVVAVFLVCQVPYNFLLLIKATQLGRTDRQCSEKINYAYAFFITETLAFFHCCLNPVVYAFVGVKFRNYFIKIMQDLWCISKQYMVGNRISRATSEIYTSRRTSEVYVTEGGSSFTM
>Ccr7_XP_004918750.1
MQTQGRIHIFLILSIAMGVLKLSAGDNTFSPEENVEYSTMDYSDFQTVCEKVEVRNFRSAFLPAMYAIVGLVGLAGNGLVMVRYLYFNRLKTGTDYYMLNLAIADIVFLLTLPFWAVSVAKTWIFGNEMCKIIYCLYKMSFFSGMFLLMCVSMERYFAIVQAPSAHRHRSKTVLISKLSSLGIWVFAFLLSIPELLYSGVKENAKVDMCIIFSDSIQSLTAKLKISQMFFGFFLPLLIMVSCYCMIIRKLLQARNFEKYKAIKVIIAIVIVFVAFQLPYNSVMLIRAFSNSTECDTSKNLDIADDVTYSLACFRCCLNPFLYAIIGIKFRNDLYKLFKDIGCLSQEKCSEWSSAKPSKRTSLAMDTETTTTFSP
>Ccr7.L_NP_001091194.1
MSILQYSTGEDNVSMDDNMEYSTMDYGGFPTVCQKDDVRSFRSAFLPAMYSVICLVGLAGNGLVMIRYLYFNRLKTGTDYYMLNLAIADIVFLLTLPFWAVSVAKNWVFGNEMCKIIYCLYKMSFFSGMFLLMCVSMERYFAIVQAPSAHRHRSKTVLISKLSSLGIWVLAFLLSIPELLYSGLKDNHGVGMCIIFSDNIQSLSSKLKISQMFFGFFLPLIIMASCYYMIIRKLLQARNFEKYKAIKVIIAIVIVFVTFQLPYNSVMLIRTLNNSTDCDTSKNLDFADDVTYSLACLRCCLNPFLYVIIGIKFRNDLCKLFKDIGCLSHEKFTEWSSTKPSKRTSFAMDTETTTTFSP
>Ccr7.S_OCT59880.1
MPISMAAHIQGLQKISYIVPIVMATFQLAVGEDNVSTDENVPYSTMDYSDLQTVCQKGDVRTFRSSFLPAMYTIICLVGLAGNGLVMIRYLYFNRLKNGTDYYMLNLAIADIVFLLTLPFWAVSVAKNWVFGSEMCKIIYCLYKMSFFSGMFLLMCVSMERYFAIVQAPSAHRHRSKTVLISKLSSLGIWVFAFLLSIPELLYSGVNNNGGVNMCIIFSNSIQSLSAKLKISQMFFGFFLPLIIMALCYCMIIRKLLQARNFEKYKAIKVIIAIVIVFVAFQLPYNSVMLIKTFDNGTDCEASKKLDIADDVTYSLACFRCCLNPFLYAIIGIKFRNDLCKLFKDIGCLSQEKITEWSSAKPSRRTSFAMDTETTTTFSP
>Ccr8_XP_017947772.1
MNVTDSNILDTTNDYIYSESTETFENSRTFTFHFLPVLYCLAFTFGLVGNILVIFVLVYCKKLRTTTDVYLFNMAVSDLLFVVSLPFIAYTIINEWIFGNIMCKILSTIYFVGFFSSIFFITVMSVDRYFAIVHVVFALRVRNVRWGLIVSIVVWVLALSISTPNFKFHEIVMTGNYTECVLSYPEINRQNWKIFCSLLINIFGLVIPLFILLFSYLHIIKTLQNSKCKQKRCAIRLILIVGIVFFIFWTPYNIVVFLNILKTSGAVDLETDQLQTAADVTHTLSLVHCCLNPIIYTFAGEKFRGYLRLIINRPLNFVHSSRIVGSYKTSVSDYASSTSRISKGSFSSESIL
>Ccr8.L_XP_041442327.1
MNVTDNSILDTTYDYIYSESTETFENSGTFTFHFLPALYCLAFSFGLVGNVLVILVLVYYKKLQTTTDVYLFNMAVSDLLFVVSLPFIAYTIKNEWIFGNAMCKMLSTIYFVGFFSSIFFITVMSVDRYFAIVHVVFALKVRNVRWGFIISIIVWVLALSISTPNFIFHKIVMTDNYTECVLSYPENNEQNWKIFCSLLINIFGLVIPLFILLFSYVHILKTLQNSKCKQKRCAIRLILIVGIVFFLFWTPYNVVVFLNILQSSGTIDLEAEQLQTATDLTHTLSLVHCCLNPIIYTFAGEKFRVYLRSIINKPLKCMHSSRLVGSYKASVTDYASSTSRISKGSFSSESIL
>Ccr9_XP_002940844.3
MDHMSGKVIVGGVLHEVVGQVSGIPTEAEGGVANPGAEIEGRVGITGSISHAGEEGWLAELFQVERGVTEKVTEFFTGEEEYEDQYTLSTLDYVIFDPGVFCEKNSVREFASYVLPPIYWCVFLFGLVGNSLVLAVYVYNRKLKTMTDTFLINLAIADILFLITLPFWAIAASHDWVFKTALCKAVNSMYSVNVYSGMLLLACISIDRYIAIVQATKAQKYQTKKLLISKLTCFIVWALSTGLSLPEILFSVVKEEFNSTTCTMSYPAELSKTFKVSVLSLKVTVAFCLPFLVMVFCYAMIIPILVQARGFQRHKALKVIFAVLSVFILSQLPYNSILVLRVLNAANINDFECATTQNIDIAYKITQSVAFLHCCLNPFIYVFVGVKFRSDLLKILQKCIGEQQWAKGLWGDNNKKPLSETRESKMGTLSL
>Ccr9.L_OCT76112.1
MFYFQVTQLFAEEEHEDQYTLSTLDYVVFDPGVFCEKNSVREFASYVLPPIYWCVFLFGLIGNSLVLITCVYNRKLKTMTDIFLINLTIADILFLITLPFWAIATSRDWVFKTALCKAVNSMYSVNVYSGMLLLACISIDRYIAIVQATKAQKYRTKKLIISKLTCLIVWALSTGLSLPEILFSIVKEESNSSTCTMSYPAELSKTLKVGVLSLKVTVAFCLPFLVMVFCYAMIIPILVQARGFQRHKALKVIFTILSVFILSQLPYNCILVLRALNTANVSSFECATTQNIDIAYKITQSIAFLHCCLNPFIYVFVGVRFKSDLLNILKKCTCIGEQQWAKVLLGDNNKKPLSETRDSKMGTLSL
>Ccr10_XP_017953350.1
MVGNGLVLLTYWFCRKIKSMTDVYLISLALADLLLVLSFPFLGINAVQGWIFGNIMCKVVQGLYSVNFFSGLLFLTCISVDRYIEIVQAVQAHKCRHKSIYYSKLTCIVVWVFSLLLTLPQFIYSHSESIGGFYHCKMIFPEEVTATVKGISNVAQIIFGFIIPSLVMVFCYSVIVKTLLSSKTLRRHKTLKVIISLVVVFVMFQLPHSVVIFLETADILQSKQMPCEVSKKKDVALIVTSSLAFTRCCLNPILYAFVGVTFRRDILLLLKNLGCISRASTTYNGSRRLHASSVHIDTSSFSL
>Ccr10.L_XP_018092493.1
MIGNSLVLLTYWFCRKIKSMTDVYLISLALADILLVLSFPFLGINAIQGWIFGNIMCKVVRGLYSVNFFSGFLFLTCISVDRYIEIVQAVEAHKFRHKSIYYSKLTCIIVWALSLLLTLPQLIYSHSEVVNGFYHCKMIFPEEVTTTVKGISNIAQIIFGFIVPSLVMVFCYSVIIKTLQSSMSFRRHKTLKVVISLVVVFVMFQLPYSVVIFLETTDILQSKQMPCEVSKQKDVALIITSSLAFTRCCLNPILYAFIGVTFRRDILLLLKNLGCISRVSTKYNGPKRLYVSSVPMDTSSFSL
>Xcr1_XP_031759924.1
MEETYYSGFNETDYGGYSEPCDKNDIYEFATLFNTILNSVLFSFSIIGNCLVLWILIKYESLVSLTNVFIFNLSIADLILSSWLPLFIVYHRQGWVFGEVACKILNAFFSIGFYSGIIFLTFMTFHRYLSVVDPLSALKAKNPLFGVAASLLSWLISICASIPVIIYKAQVDRNGFIICEYRDNLPHLVSNYQQNIVFLIAFVVIIVCYFSIIKTLRRSRSQRNHKPVKLIFIIVVVYFVSWAPYNIVMLLQSFEKQQLFKSFRDCDFSKNLDYAKSVSEKLAISHCCLNPILYAFVGIKFRQHLKRLLHYRPCKHEEQTTSIRTNSHDHYHNNDGSLY
>Xcr1.L_XP_018122452.1
MQETTAYYSTYTPDYDDFSTPCDKNDIYKFATLFTTILNSVLFFFSIIGNCLVLWILIKYESLVSLTNVFIFNLSIADLILSSWLPLFIVYHRRGWLYGELACKIVNAFFSIGFYSGIIFLTFMTFHRYLSVVAPLSALKARNPLFGIAASVLSWLISICASIPVIIYKVEVNKDDFISCEYSDTVPYLVSNYQQNLVFLFAFTVIIVCYFTIIKTLRRSRSQRNHKPVKLIFIIVVVYFFSWAPYNIVILLQSFEKQHLFQSFSDCGLSKSLDYAKYVSEKLAISHCCLNPILYAFVGIKFRQHLKHLLNYRLCKHEEQTTTVRTHSHDHNHNNDGSLY
>Xcr2_XP_017950357.1
MWTTEGYDYDTLDYTDGSLISLCEKEDLQSFLSFYPIVFYILFVLSITGNMMILIILLKWEKFNTVTNIFILNLVISDVLFSVTLPFTAFYISSSWIFGNVMCKLTTAFYFSGFQSFVIFLTLMTIDQYLMIVHSWSSTSRSRIQYAVNISVIAWCLSILFSLPEVILSSTKVMNTGETVCEMLTFQNEQNKWWLVIGHYKHFSLFFIIPIIIIVICYIGIALKLTTCNIRRKAKVLKLIFVIAFLFFLCWIPYNITMILMFQETIESFNNCKSVLHYVFYISQTLLYIHCCTNPLLYTFLGTKFKRYFRCSFSRLCLPRVLSMEHDISLRTSMLNAV
>Xcr2.L_XP_018123034.1
MTTTEAYDYDFAYSTDYPDSNTDLPISVCEKEDLQSFLSFFAPIVFYILFVLSITGNALILIILVKWEKFNTVTNIFILNLVISDVLFSATLPFTAFYIYSSWIFGDLMCKLTTAFYYSGFQSFVIFLTLMTVDQYLMIVHSWSSTSRSRIQYAVNISVIAWCLSITLSLPDVILSSTKENDFGDTVCEMLSIQDKKNWWIVIGHYKHFFLFFIVPIVIIVACYIGIVLKLTTCHIRRKAKVFKLIFVIAFLFFLCWIPYNIIMILMFHGTIESFKNCNSILHYVFYIFQTLLYFHCCINPLLFTFLGTKFRRHFSCSFSNLCLPRVMSMEHDMSLRTSMLNAI
>Xcr2.S_OCT74299.1
MWTTEPYDYDFISSTDYTDVNTDLPISFCEKEDLQSFSSFYVPIVFYILFFFSITGNMLILIILVKWEKFNTVTNIFILNLVISDVLFSVTLPFTAVYISSSWIFGNLMCKMTTAFYFSGFQSFVIFLTLMTVDQYLMILHSWSSTSRSRIQYAINISVIAWCLSIMFSLPDVILSSTKEIDSGETMTKKKWWIEIGHYKHFSLFFIVPIVIIVACYIGIALKLTTCNIRRKAKVLKLIFVIAFLFLLCWVPYNITMILMFQETIESFKNCYSILHYLFYIFQMLLYFHCCTNPLLYTFLGTKFRRYFSCSFSRLCLPRVMSMEHDMSLRTSMLNAV
>Xcr3_KAE8597334.1
MSSEELKTTMSNSVEIHLSNSTMGFSTTTYEDETIVYMCSNDESIKFGAAAVPFFYYTVFTLSLLGNGLILFLLLKYEKIKTVTNLFILNLVISDLLFTITLPFWAFYHSNEWVFGNGMCKVVSSVFFIGFFSCILFLTVMTMDRYLAVVHAVSAARTRKLIYVYVASIAIWVISFVSTVPKFVLYGTRKHDSAGILCEETGFSADKIDTWRRLGYYQQLTMFFLFPLIVILYCYTLIVVKLFNTKMHNKDKAVKLISVIVLAFFICWTPYNVVIFLRLSPGDPCNDYLNNAFYICRNIAYFHCCINPFFYTFVGTKFRRHLSALLGTNCLSMFRRSSSSSRTSEYSPQTIYE
>Xcr3.L_XP_018122454.1
MSNSVEIHHSSSTMDFSTRSYDDEPEIYICPKDESVKFGAAAVPFFYYTVFTFSLLGNCLILFLLLKYEKIKTVTNLFILNLVISDILFTISLPFQAFYHSNEWVFGNSMCKVVSSAFFIGFFSCILFLTVMTIDRYMAVVHAVSAARTRKLIYVYVASIAIWVTSFVSTIPKFVLYGTRIDSSAGILCEETGYSAEKIDTWKQFGYYQQLTMFFLFPLIVILYCYTLIIVKLFYTKMHNKDKAVKLIFVIVLAFFICWTPYNVVILIKLSQGDTCNDYIDNAYYICRNIAHLHCCINPFFYTFVGTKFRRHLSTLFGTNCWSMFRRSSSSSRTTEYSPQTIYE
